# Supplementary material
Source: publisher site journal article supplement (https://journals.iucr.org/services/coeditors/meetings/jmb/2024/AppendixF_ActaB.pdf)
Supplement: Supplementary file 1 [file AppendixF_ActaB.pdf]

# 2022 Journal Performance Data for: Acta Crystallographica Section B-Structural Science Crystal Engineering and Materials

ISSN

N/A

EISSN

2052-5206

JCR ABBREVIATION

ACTA CRYSTALLOGR B

ISO ABBREVIATION

Acta Crystallogr. Sect. B-Struct.  
Sci.Cryst. Eng. Mat.

## Journal Information

EDITION

Science Citation Index  
Expanded (SCIE)

CATEGORY

CHEMISTRY,  
MULTIDISCIPLINARY - SCIE  
CRYSTALLOGRAPHY - SCIE

LANGUAGES

English

REGION

ENGLAND

1ST ELECTRONIC JCR YEAR

1997

## Publisher Information

PUBLISHER

INT UNION  
CRYSTALLOGRAPHY

ADDRESS

2 ABBEY SQ, CHESTER CH1  
2HU, ENGLAND

PUBLICATION FREQUENCY

6 issues/year

# Journal's Performance

## Journal Impact Factor

The Journal Impact Factor (JIF) is a journal-level metric calculated from data indexed in the Web of Science Core Collection. It should be used with careful attention to the many factors that influence citation rates, such as the volume of publication and citations characteristics of the subject area and type of journal. The Journal Impact Factor can complement expert opinion and informed peer review. In the case of academic evaluation for tenure, it is inappropriate to use a journal-level metric as a proxy measure for individual researchers, institutions, or articles. [Learn more](#)

2022 JOURNAL IMPACT FACTOR

1.9

2022 JOURNAL IMPACT FACTOR WITHOUT SELF CITATIONS

1.8

## Journal Impact Factor Trend 2022

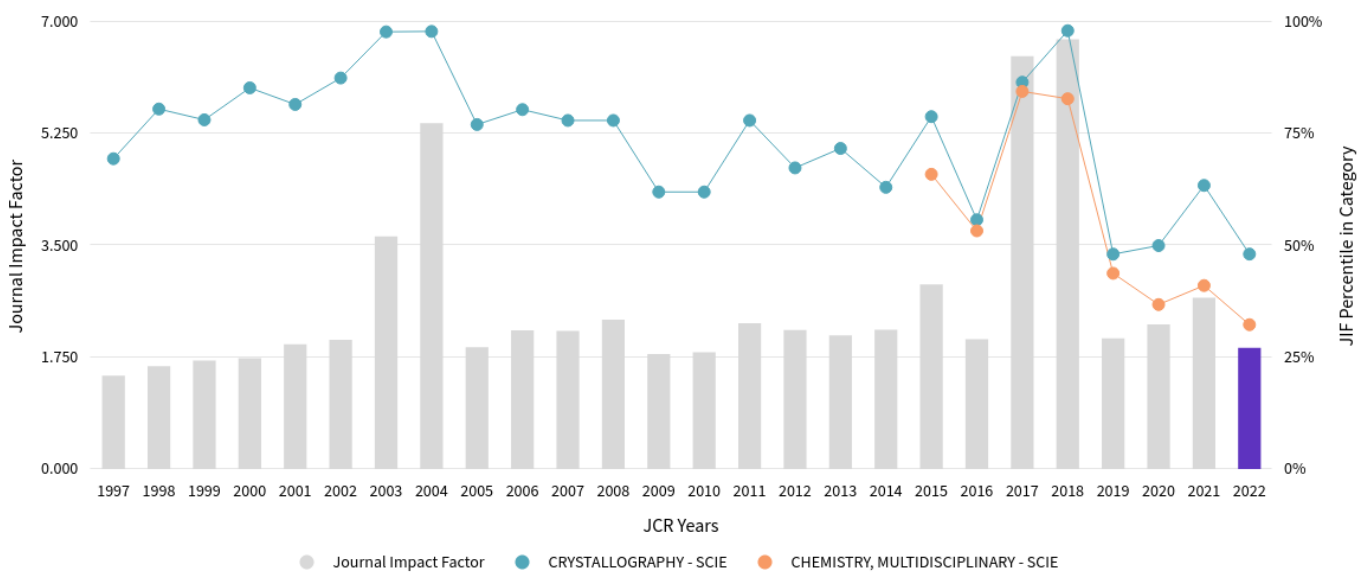

Journal Impact Factor is calculated using the following metrics

$$\frac{\text{Citations in 2022 to items published in 2020 (216) - 2021 (177)}}{\text{Number of citable items in 2020 (107) + 2021 (102)}} = \frac{393}{209} = 1.9$$

Journal Impact Factor without self cites is calculated using the following metrics

$$\frac{\text{Citations in 2022 to items published in 2020 (216) + 2021 (177) - Self Citations in 2022 to items published in 2020 (7) + 2021 (20)}}{\text{Number of citable items in 2020 (107) + 2021 (102)}} = \frac{393 - 27}{209} = 1.8$$

## Journal Impact Factor Contributing Items

### Citable Items (209)

| TITLE                                                                                                                                                                                                                                                                                                                                                                                                           | CITATION COUNT                                                                         |
|-----------------------------------------------------------------------------------------------------------------------------------------------------------------------------------------------------------------------------------------------------------------------------------------------------------------------------------------------------------------------------------------------------------------|----------------------------------------------------------------------------------------|
| <p>A half-salamo-based pyridine-containing ligand and its novel Ni-II complexes including different auxiliary ligands: syntheses, structures, fluorescence properties, DFT calculations and Hirshfeld surface analysis<br/>Authors: Feng, Tao;Li, Li-Li;Li, Ya-Juan;Dong, Wen-Kui<br/>Volume: 77<br/>Accession number: WOS:000618681800017<br/>Document Type: Article</p>                                       | 25                                                                                     |
| <p>Crystallization of chiral molecular compounds: what can be learned from the Cambridge Structural Database?<br/>Authors: Rekiş, Toms<br/>Volume: 76<br/>Accession number: WOS:000538776100003<br/>Document Type: Article</p>                                                                                                                                                                                  | 10                                                                                     |
| <p>Czochralski growth of mixed cubic sesquioxide crystals in the ternary system Lu<sub>2</sub>O<sub>3</sub>-Sc<sub>2</sub>O<sub>3</sub>-Y<sub>2</sub>O<sub>3</sub><br/>Authors: Kraenkel, Christian;Uvarova, Anastasia;Haurat, Emile;Huelshoff, Lena;Bruetzsch, Mario;Gugushev, Christo;Kalusniak, Sascha;Klimm, Detlef<br/>Volume: 77<br/>Accession number: WOS:000683554100010<br/>Document Type: Article</p> | 10  |
| <p>Melting points of one- and two-component molecular crystals as effective characteristics for rational design of pharmaceutical systems<br/>Authors: Perlovich, German<br/>Volume: 76<br/>Accession number: WOS:000562034500021<br/>Document Type: Article</p>                                                                                                                                                | 10                                                                                     |
| <p>Incommensurate crystal structure of PbHfO<sub>3</sub><br/>Authors: Bosak, Alexei;Svitlyk, Volodymyr;Arakcheeva, Alla;Burkovsky, Roman;Diadkin, Vadim;Roleder, Krystian;Chernyshov, Dmitry<br/>Volume: 76<br/>Accession number: WOS:000513005400002<br/>Document Type: Article</p>                                                                                                                            | 9                                                                                      |

Showing 1-5 rows of 209 total (use export in the relevant section to download the full table)

## Journal Impact Factor Contributing Items

### Citing Sources (149)

| SOURCE NAME                                                                           | COUNT |
|---------------------------------------------------------------------------------------|-------|
| ACTA CRYSTALLOGRAPHICA SECTION B-STRUCTURAL SCIENCE CRYSTAL ENGINEERING AND MATERIALS | 27    |
| CRYSTAL GROWTH & DESIGN                                                               | 26    |
| JOURNAL OF MOLECULAR STRUCTURE                                                        | 22    |
| CRYSTENGGCOMM                                                                         | 14    |
| MOLECULES                                                                             | 11    |
| CHEMISTRY-A EUROPEAN JOURNAL                                                          | 10    |
| INORGANICA CHIMICA ACTA                                                               | 9     |
| PHYSICAL REVIEW B                                                                     | 9     |
| CRYSTALS                                                                              | 8     |
| JOURNAL OF PHYSICAL CHEMISTRY C                                                       | 8     |
| JOURNAL OF APPLIED CRYSTALLOGRAPHY                                                    | 7     |
| JOURNAL OF STRUCTURAL CHEMISTRY                                                       | 6     |
| PHYSICAL CHEMISTRY CHEMICAL PHYSICS                                                   | 6     |
| POLYHEDRON                                                                            | 6     |
| IUCRJ                                                                                 | 5     |
| JOURNAL OF ALLOYS AND COMPOUNDS                                                       | 5     |
| JOURNAL OF COORDINATION CHEMISTRY                                                     | 5     |
| JOURNAL OF THE AMERICAN CHEMICAL SOCIETY                                              | 5     |
| MATERIALS                                                                             | 5     |
| APPLIED ORGANOMETALLIC CHEMISTRY                                                      | 4     |

Showing 1-20 rows of 149 total (use export in the relevant section to download the full table)

# Journal Citation Indicator (JCI)

0.69

The Journal Citation Indicator (JCI) is the average Category Normalized Citation Impact (CNCI) of citable items (articles & reviews) published by a journal over a recent three year period. The average JCI in a category is 1. Journals with a JCI of 1.5 have 50% more citation impact than the average in that category. It may be used alongside other metrics to help you evaluate journals. [Learn more](#)

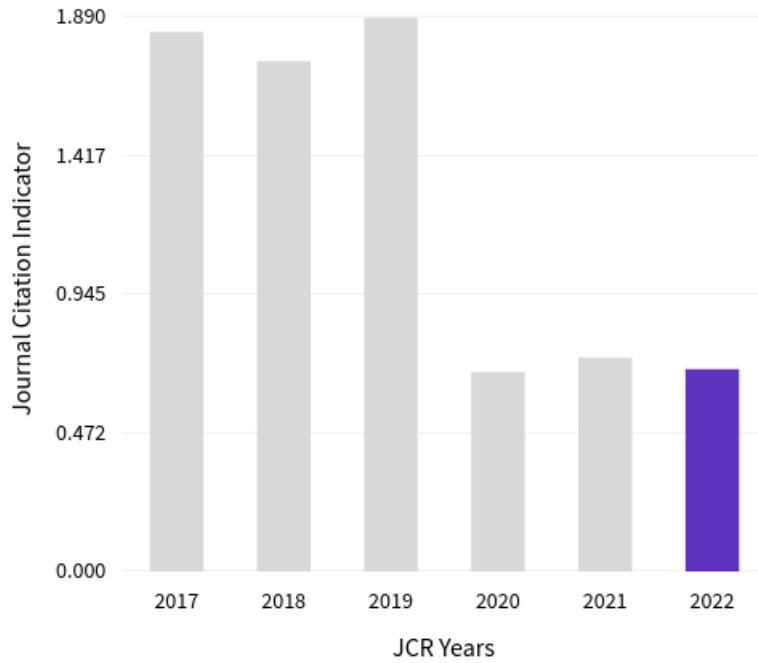

# Total Citations

## 11,932

The total number of times that a journal has been cited by all journals included in the database in the JCR year. Citations to journals listed in JCR are compiled annually from the JCR years combined database, regardless of which JCR edition lists the journal.

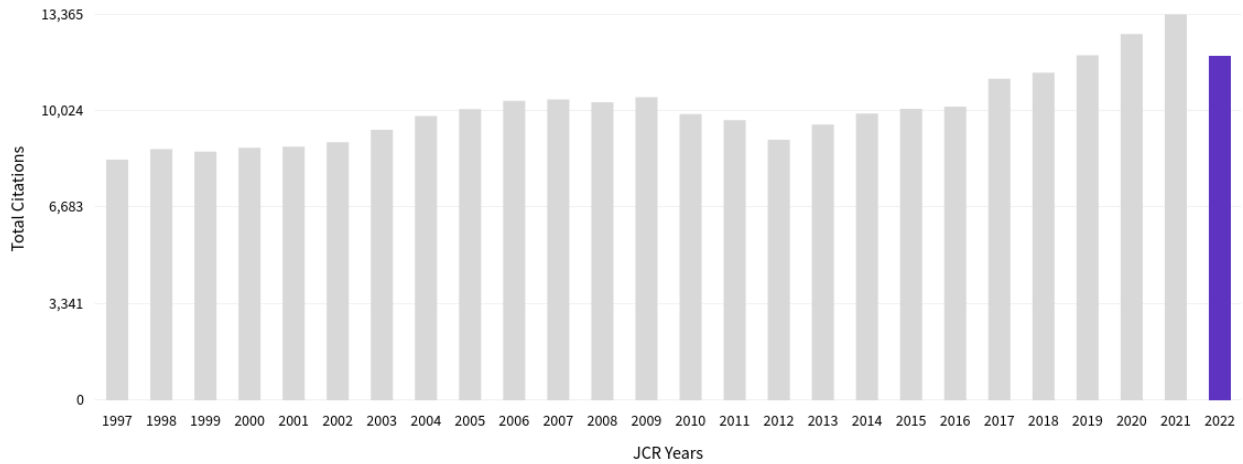

# Citation Distribution

The Citation Distribution shows the frequency with which items published in the year or two years prior were cited in the JCR data year (i.e., the component of the calculation of the JIF). The graph has similar functionality as the JIF Trend graph, including hover-over data descriptions for each data point, and an interactive legend where each data element's legend can be used as a toggle. You can view Articles, Reviews, or Non-Citable (other) items to the JIF numerator. [Learn more](#)

ARTICLE CITATION MEDIAN

**1**

REVIEW CITATION MEDIAN

**4.5**

UNLINKED CITATIONS

**1**

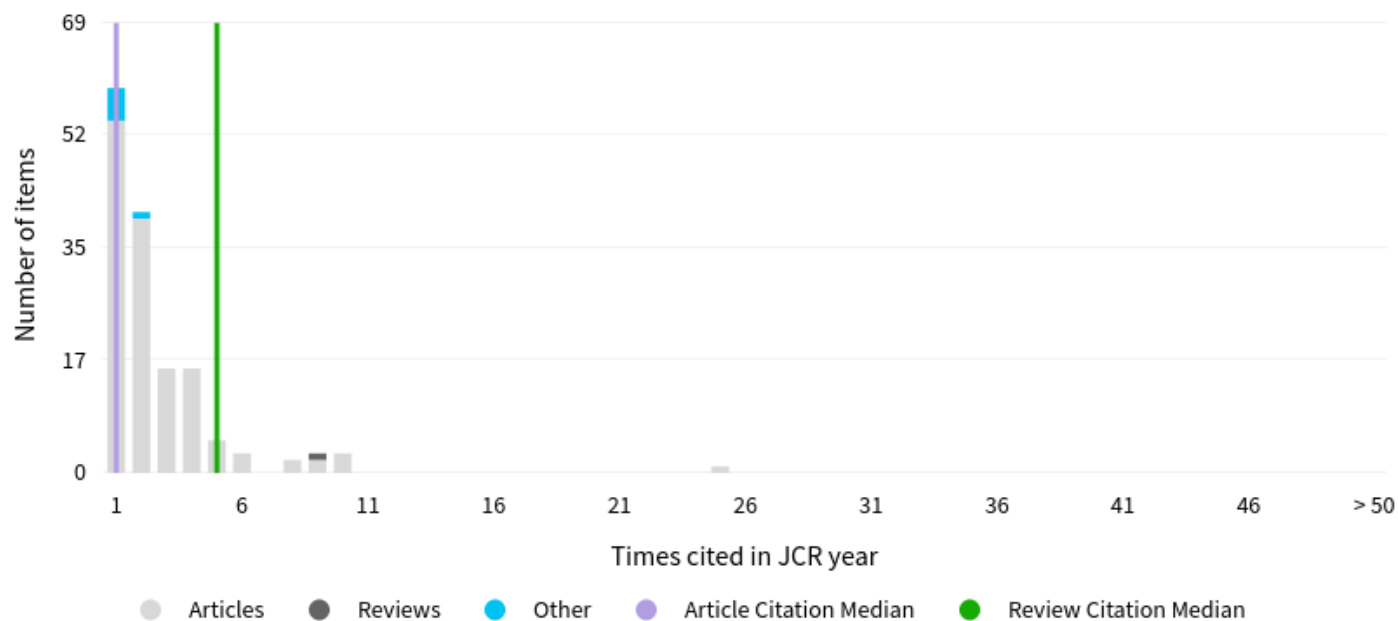

## 0 times cited

ARTICLES

**66**

REVIEWS

**1**

OTHER

**14**

## Open Access (OA)

The data included in this tile summarizes the items published in the journal in the JCR data year and in the previous two years. This three-year set of published items is used to provide descriptive analysis of the content and community of the journal. [Learn more](#)

### Items

TOTAL CITABLE % OF CITABLE OA

**293** **23.21%**

CITABLE

● GOLD OPEN ACCESS

68 / 20.99%

● SUBSCRIPTION OR BRONZE

225 / 69.44%

NON-CITABLE

● OTHER (NON-CITABLE ITEMS)

31 / 9.57%

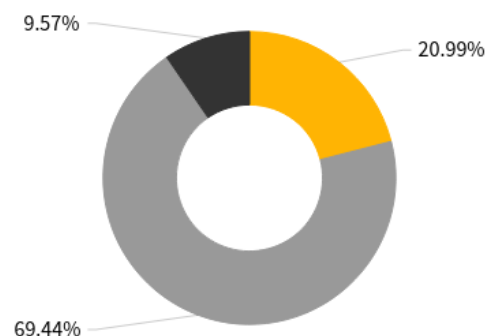

### Citations\*

TOTAL CITABLE % OF CITABLE OA

**435** **22.76%**

CITABLE

● GOLD OPEN ACCESS

99 / 22.20%

● SUBSCRIPTION OR BRONZE

336 / 75.34%

NON-CITABLE

● OTHER (NON-CITABLE ITEMS)

9 / 2.02%

● UNLINKED CITATIONS

2 / 0.45%

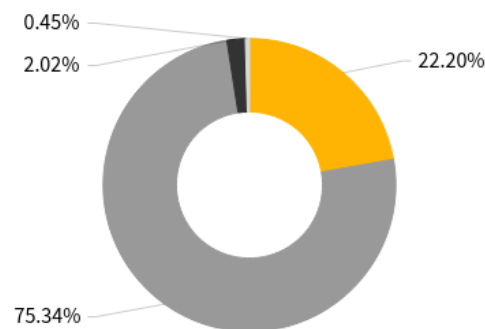

\* Citations in 2022 to items published in (2020-2022)

## Rank by Journal Impact factor

Journals within a category are sorted in descending order by Journal Impact Factor (JIF) resulting in the Category Ranking below. A separate rank is shown for each category in which the journal is listed in JCR. Data for the most recent year is presented at the top of the list, with other years shown in reverse chronological order. [Learn more](#)

### EDITION

Science Citation Index Expanded (SCIE)

### CATEGORY

CHEMISTRY, MULTIDISCIPLINARY

**121/178**

| JCR YEAR | JIF RANK | QUART ILE | JIF PERCENTILE |  |
|----------|----------|-----------|----------------|--|
| 2022     | 121/178  | Q3        | 32.3           |  |
| 2021     | 106/179  | Q3        | 41.06          |  |
| 2020     | 113/178  | Q3        | 36.80          |  |
| 2019     | 100/177  | Q3        | 43.79          |  |
| 2018     | 30/172   | Q1        | 82.85          |  |
| 2017     | 27/171   | Q1        | 84.50          |  |
| 2016     | 78/166   | Q2        | 53.31          |  |
| 2015     | 56/163   | Q2        | 65.95          |  |
| 2014     | N/A      | N/A       | N/A            |  |
| 2013     | N/A      | N/A       | N/A            |  |
| 2012     | N/A      | N/A       | N/A            |  |
| 2011     | N/A      | N/A       | N/A            |  |
| 2010     | N/A      | N/A       | N/A            |  |
| 2009     | N/A      | N/A       | N/A            |  |
| 2008     | N/A      | N/A       | N/A            |  |
| 2007     | N/A      | N/A       | N/A            |  |
| 2006     | N/A      | N/A       | N/A            |  |
| 2005     | N/A      | N/A       | N/A            |  |
| 2004     | N/A      | N/A       | N/A            |  |
| 2003     | N/A      | N/A       | N/A            |  |
| 2002     | N/A      | N/A       | N/A            |  |
| 2001     | N/A      | N/A       | N/A            |  |
| 2000     | N/A      | N/A       | N/A            |  |
| 1999     | N/A      | N/A       | N/A            |  |
| 1998     | N/A      | N/A       | N/A            |  |
| 1997     | N/A      | N/A       | N/A            |  |

### EDITION

Science Citation Index Expanded (SCIE)

### CATEGORY

CRYSTALLOGRAPHY

**14/26**

| JCR YEAR | JIF RANK | QUART ILE | JIF PERCENTILE |  |
|----------|----------|-----------|----------------|--|
| 2022     | 14/26    | Q3        | 48.1           |  |
| 2021     | 10/26    | Q2        | 63.46          |  |
| 2020     | 13/25    | Q3        | 50.00          |  |
| 2019     | 14/26    | Q3        | 48.08          |  |
| 2018     | 1/26     | Q1        | 98.08          |  |
| 2017     | 4/26     | Q1        | 86.54          |  |
| 2016     | 12/26    | Q2        | 55.77          |  |
| 2015     | 6/26     | Q1        | 78.85          |  |
| 2014     | 9/23     | Q2        | 63.04          |  |
| 2013     | 7/23     | Q2        | 71.74          |  |
| 2012     | 8/23     | Q2        | 67.39          |  |
| 2011     | 6/25     | Q1        | 78.00          |  |
| 2010     | 10/25    | Q2        | 62.00          |  |
| 2009     | 10/25    | Q2        | 62.00          |  |
| 2008     | 6/25     | Q1        | 78.00          |  |
| 2007     | 6/25     | Q1        | 78.00          |  |
| 2006     | 5/23     | Q1        | 80.43          |  |
| 2005     | 6/24     | Q1        | 77.08          |  |
| 2004     | 1/24     | Q1        | 97.92          |  |
| 2003     | 1/23     | Q1        | 97.83          |  |
| 2002     | 3/20     | Q1        | 87.50          |  |
| 2001     | 4/19     | Q1        | 81.58          |  |
| 2000     | 3/17     | Q1        | 85.29          |  |
| 1999     | 4/16     | Q1        | 78.13          |  |
| 1998     | 4/18     | Q1        | 80.56          |  |
| 1997     | 6/18     | Q2        | 69.44          |  |

## Rank by Journal Citation Indicator (JCI)

Journals within a category are sorted in descending order by Journal Citation Indicator (JCI) resulting in the Category Ranking below. A separate rank is shown for each category in which the journal is listed in JCR. Data for the most recent year is presented at the top of the list, with other years shown in reverse chronological order. [Learn more](#)

### CATEGORY

CHEMISTRY, MULTIDISCIPLINARY

**79/230**

| JCR YEAR | JCI RANK | QUART ILE | JCI PERCENTILE |  |
|----------|----------|-----------|----------------|--|
| 2022     | 79/230   | Q2        | 65.87          |  |
| 2021     | 73/224   | Q2        | 67.63          |  |
| 2020     | 73/219   | Q2        | 66.89          |  |
| 2019     | 20/215   | Q1        | 90.93          |  |
| 2018     | 22/212   | Q1        | 89.86          |  |
| 2017     | 21/205   | Q1        | 90.00          |  |

### CATEGORY

CRYSTALLOGRAPHY

**12/33**

| JCR YEAR | JCI RANK | QUART ILE | JCI PERCENTILE |  |
|----------|----------|-----------|----------------|--|
| 2022     | 12/33    | Q2        | 65.15          |  |
| 2021     | 12/33    | Q2        | 65.15          |  |
| 2020     | 13/33    | Q2        | 62.12          |  |
| 2019     | 1/33     | Q1        | 98.48          |  |
| 2018     | 2/32     | Q1        | 95.31          |  |
| 2017     | 2/31     | Q1        | 95.16          |  |

# Citation network

## Cited Half-life

25.9 years

The Cited Half-Life is the median age of the items in this journal that were cited in the JCR year. Half of a journal's cited items were published more recently than the cited half-life.

TOTAL NUMBER OF CITES

11,932

NON-SELF CITATIONS

11,703

SELF CITATIONS

229

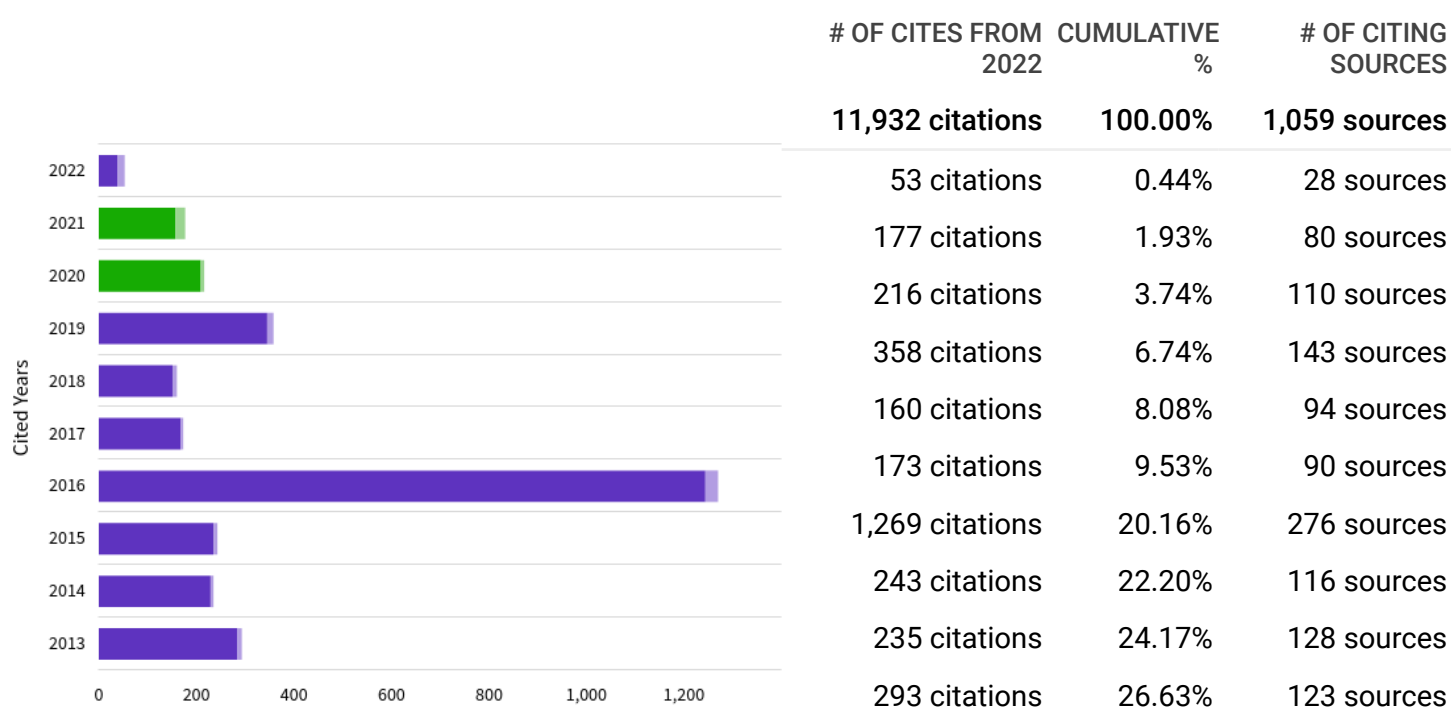

Previous years:  
8,755 citations

● Non-self citations: citations to the journal from the items in other sources

● Citations to items in the journal from items in the same journal

● Citations used to calculate the Impact Factor

## Citing titles in all years

Acta Crystallographica Section B-Structural Science Crystal Engineering and Materials

|    | SOURCE NAME                                                                           | COUNT |
|----|---------------------------------------------------------------------------------------|-------|
|    | All Others                                                                            | 394   |
| 1  | CRYSTAL GROWTH & DESIGN                                                               | 416   |
| 2  | ACTA CRYSTALLOGRAPHICA SECTION E-STRUCTURE REPORTS ONLINE                             | 387   |
| 3  | INORGANIC CHEMISTRY                                                                   | 365   |
| 4  | Journal of Molecular Structure                                                        | 324   |
| 5  | CRYSTENGGCOMM                                                                         | 290   |
| 6  | Acta Crystallographica Section B-Structural Science Crystal Engineering and Materials | 229   |
| 7  | MOLECULES                                                                             | 193   |
| 8  | CHEMISTRY OF MATERIALS                                                                | 190   |
| 9  | DALTON TRANSACTIONS                                                                   | 188   |
| 10 | Crystals                                                                              | 179   |
| 11 | JOURNAL OF SOLID STATE CHEMISTRY                                                      | 173   |
| 12 | Journal of Physical Chemistry C                                                       | 166   |
| 13 | PHYSICAL REVIEW B                                                                     | 160   |
| 14 | PHYSICAL CHEMISTRY CHEMICAL PHYSICS                                                   | 158   |
| 15 | Journal of Alloys and Compounds                                                       | 151   |
| 16 | MINERALOGICAL MAGAZINE                                                                | 135   |
| 17 | ACTA CRYSTALLOGRAPHICA SECTION C-STRUCTURAL CHEMISTRY                                 | 127   |
| 18 | Materials                                                                             | 122   |
| 19 | ZEITSCHRIFT FUR ANORGANISCHE UND ALLGEMEINE CHEMIE                                    | 122   |
| 20 | IUCrJ                                                                                 | 121   |

Showing 1 - 20 rows of 653 total (use export in the relevant section to download the full table)

# Citing Half-life

## 10.5 years

The Citing Half-Life is the median age of items in other publications cited by this journal in the JCR year.

TOTAL NUMBER OF CITES  
4,292

NON-SELF CITATIONS  
4,063

SELF CITATIONS  
229

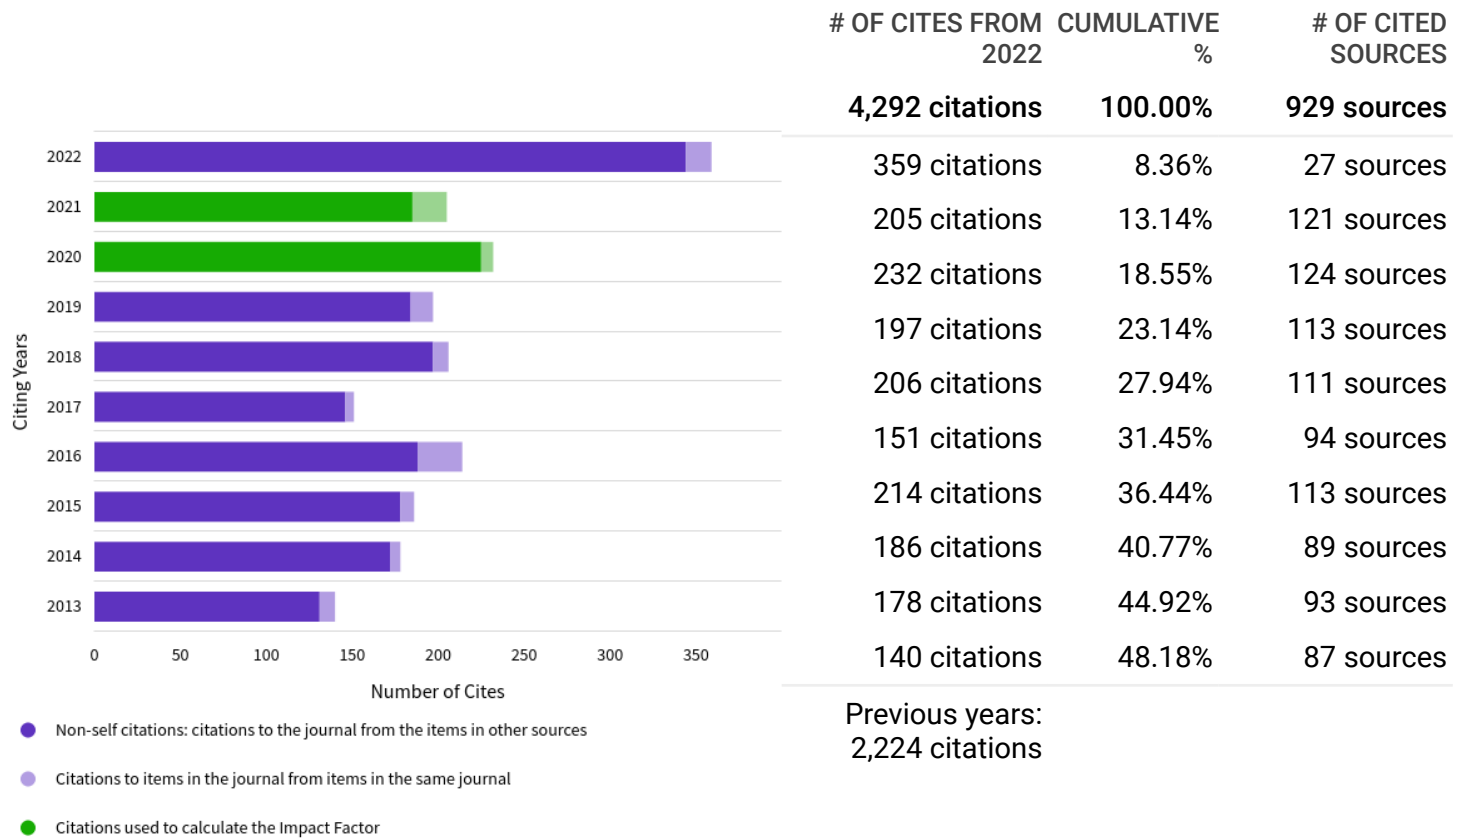

## Cited titles in all years

Acta Crystallographica Section B-Structural Science Crystal Engineering and Materials

|    | SOURCE NAME                                                                           | COUNT |
|----|---------------------------------------------------------------------------------------|-------|
|    | All Others                                                                            | 598   |
| 1  | Acta Crystallographica Section B-Structural Science Crystal Engineering and Materials | 229   |
| 2  | JOURNAL OF APPLIED CRYSTALLOGRAPHY                                                    | 207   |
| 3  | Acta Crystallographica A-Foundation and Advances                                      | 168   |
| 4  | CRYSTAL GROWTH & DESIGN                                                               | 116   |
| 5  | CRYSTENGGCOMM                                                                         | 99    |
| 6  | PHYSICAL REVIEW B                                                                     | 94    |
| 7  | ACTA CRYSTALLOGRAPHICA SECTION C-STRUCTURAL CHEMISTRY                                 | 76    |
| 8  | Journal of the American Chemical Society                                              | 66    |
| 9  | Zeitschrift fur Kristallographie-Crystalline Materials                                | 64    |
| 10 | JOURNAL OF CHEMICAL PHYSICS                                                           | 62    |
| 11 | ANGEWANDTE CHEMIE-INTERNATIONAL EDITION                                               | 55    |
| 12 | PHYSICAL REVIEW LETTERS                                                               | 47    |
| 13 | PHYSICAL CHEMISTRY CHEMICAL PHYSICS                                                   | 43    |
| 14 | INORGANIC CHEMISTRY                                                                   | 41    |
| 15 | IUCrJ                                                                                 | 40    |
| 16 | JOURNAL OF SOLID STATE CHEMISTRY                                                      | 35    |
| 17 | CHEMICAL COMMUNICATIONS                                                               | 32    |
| 18 | Journal of Physical Chemistry C                                                       | 31    |
| 19 | CHEMISTRY-A EUROPEAN JOURNAL                                                          | 28    |
| 20 | JOURNAL OF PHYSICS-CONDENSED MATTER                                                   | 28    |

Showing 1 - 20 rows of 261 total (use export in the relevant section to download the full table)

# Journal Citation Relationships

## Cited Data

Top 20 journals citing ACTA CRYSTALLOGR B by number of citations

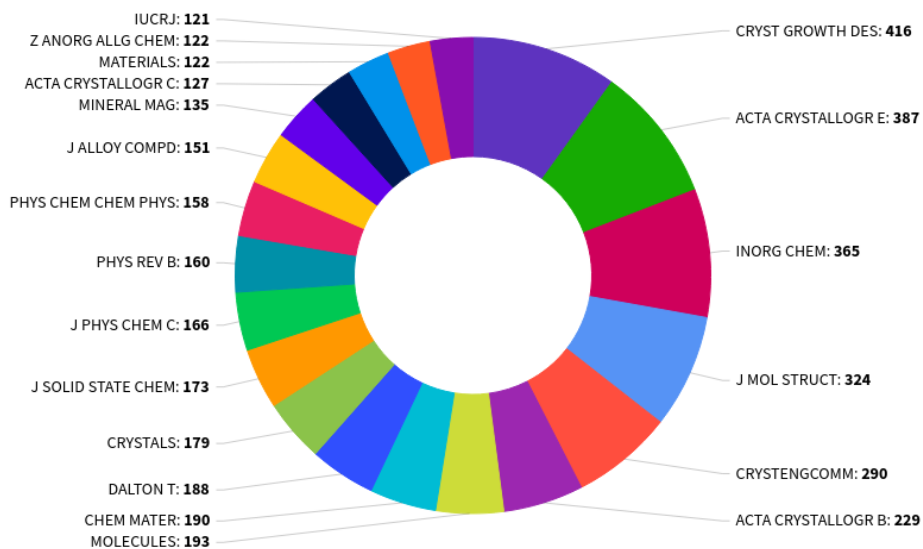

# Citing Data

## Top 20 journals cited by ACTA CRYSTALLOGR B by number of citations

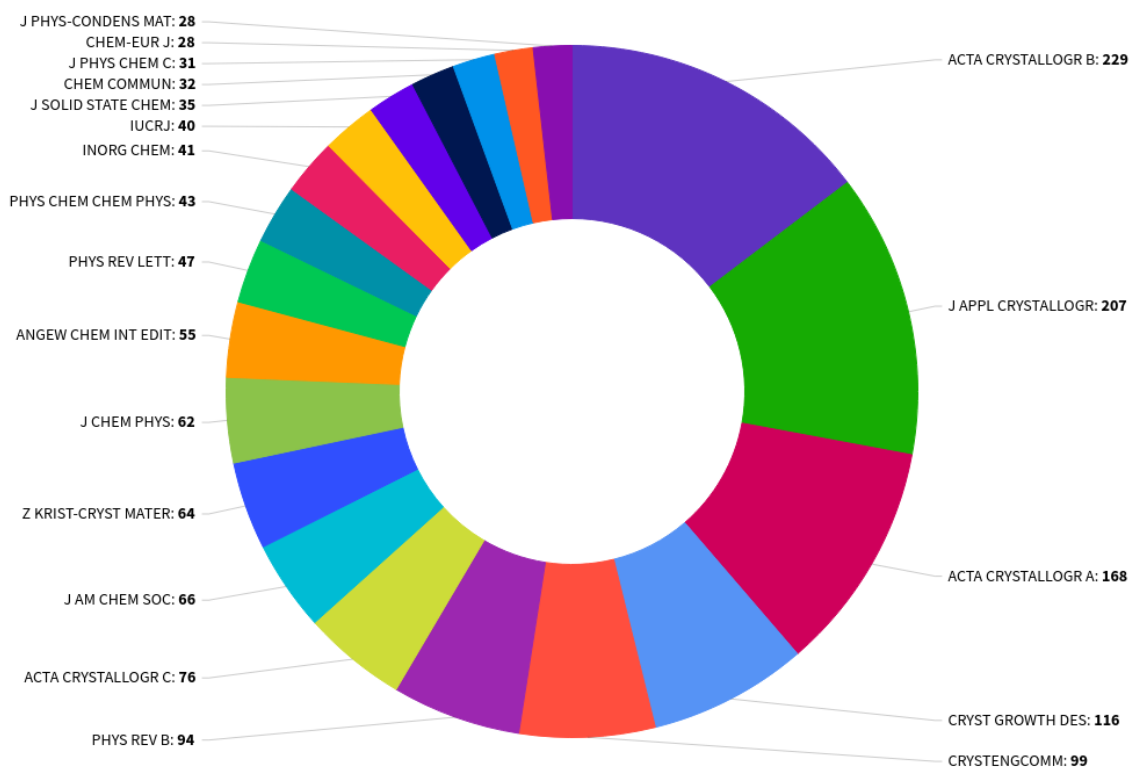

# Content metrics

## Source data

This tile shows the breakdown of document types published by the journal. Citable Items are Articles and Reviews. For the purposes of calculating JIF, a JCR year considers the publications of that journal in the two prior years. [Learn more](#)

### 84 total citable items

|                             | ARTICLES | REVIEWS | COMBINED (C) | OTHER DOCUMENT TYPES (O) | PERCENTAGE |
|-----------------------------|----------|---------|--------------|--------------------------|------------|
| NUMBER IN JCR YEAR 2022 (A) | 84       | 0       | 84           | 11                       | 88%        |
| NUMBER OF REFERENCES (B)    | 4,170    | 0       | 4,170        | 122                      | 97%        |
| RATIO (B/A)                 | 49.6     | N/A     | 49.6         | 11.1                     |            |

## Average JIF Percentile

The Average Journal Impact Factor Percentile takes the sum of the JIF Percentile rank for each category under consideration, then calculates the average of those values. [Learn more](#)

ALL CATEGORIES AVERAGE

**40.2**

EDITION

Science Citation Index Expanded

CHEMISTRY, MULTIDISCIPLINARY

**32.3**

CRYSTALLOGRAPHY

**48.1**

## Contributions by Organizations

Organizations that have contributed the most papers to the journal in the most recent three-year period. [Learn more](#)

| RANK | ORGANIZATION                                        | COUNT |  |
|------|-----------------------------------------------------|-------|--|
| 1    | RUSSIAN ACADEMY OF SCIENCES                         | 49    |  |
| 2    | CENTRE NATIONAL DE LA RECHERCHE SCIENTIFIQUE (CNRS) | 30    |  |
| 3    | POLISH ACADEMY OF SCIENCES                          | 18    |  |
| 4    | UNIVERSITE DE LORRAINE                              | 16    |  |
| 5    | LOMONOSOV MOSCOW STATE UNIVERSITY                   | 15    |  |
| 6    | EUROPEAN SYNCHROTRON RADIATION FACILITY (ESRF)      | 14    |  |
| -    | HELMHOLTZ ASSOCIATION                               | 14    |  |
| -    | SWISS FEDERAL INSTITUTES OF TECHNOLOGY DOMAIN       | 14    |  |

Showing 1 - 8 rows of 449 total (use export in the relevant section to download the full table)

## Contributions by country/region

Countries or Regions that have contributed the most papers to the journal in the most recent three-year period. [Learn more](#)

| RANK | COUNTRY/REGION        | COUNT |  |
|------|-----------------------|-------|--|
| 1    | Russia                | 59    |  |
| 2    | Poland                | 54    |  |
| 3    | France                | 51    |  |
| -    | GERMANY (FED REP GER) | 51    |  |
| 5    | USA                   | 34    |  |
| 6    | England               | 33    |  |
| 7    | Switzerland           | 24    |  |
| 8    | CHINA MAINLAND        | 23    |  |

Showing 1 - 8 rows of 59 total (use export in the relevant section to download the full table)

# Additional metrics

## Eigenfactor score

**0.00222**

The Eigenfactor Score is a reflection of the density of the network of citations around the journal using 5 years of cited content as cited by the Current Year. It considers both the number of citations and the source of those citations, so that highly cited sources will influence the network more than less cited sources. The Eigenfactor calculation does not include journal self-citations. [Learn more](#)

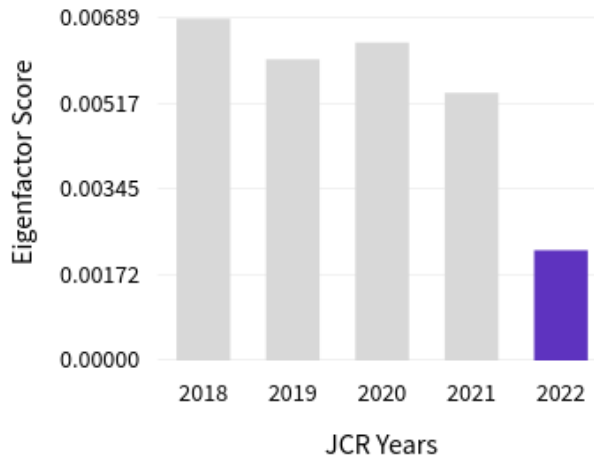

## Normalized Eigenfactor

**0.48478**

The Normalized Eigenfactor Score is the Eigenfactor score normalized, by rescaling the total number of journals in the JCR each year, so that the average journal has a score of 1. Journals can then be compared and influence measured by their score relative to 1. [Learn more](#)

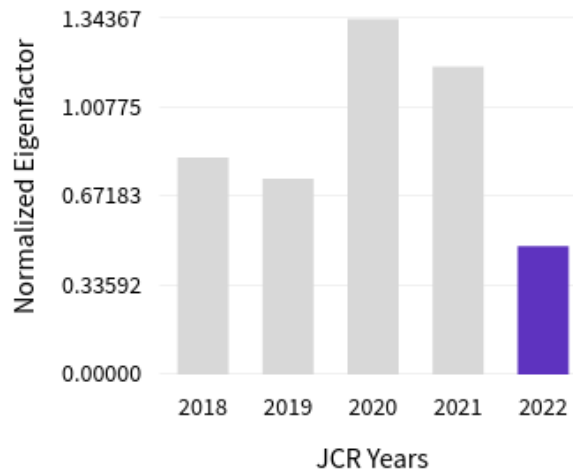

## Article influence score

**0.487**

The Article Influence Score normalizes the Eigenfactor Score according to the cumulative size of the cited journal across the prior five years. The mean Article Influence Score for each article is 1.00. A score greater than 1.00 indicates that each article in the journal has above-average influence. [Learn more](#)

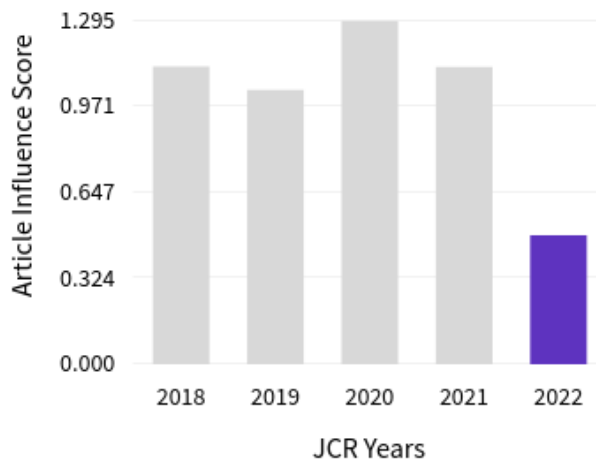

# 5 year Impact Factor

## 2.1

The 5-year Impact Factor is the average number of times articles from the journal published in the past five years have been cited in the JCR year. It is calculated by dividing the number of citations in the JCR year by the total number of articles published in the five previous years.

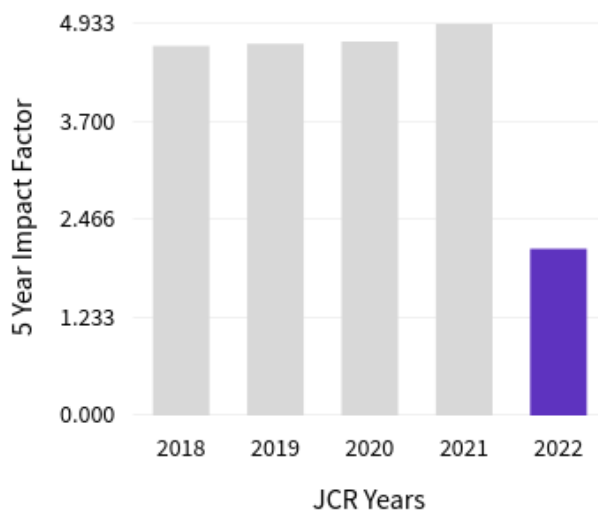

5 year Impact Factor calculation

|                                                                |   |       |   |     |
|----------------------------------------------------------------|---|-------|---|-----|
| Citations in 2022 to items published in [2017-2021]<br>(1,084) | = | 1,084 | = | 2.1 |
| Number of citable items in [2017-2021] (521)                   |   | 521   |   |     |

# Immediacy Index

0.6

The Immediacy Index is the count of citations in the current year to the journal that reference content in this same year. Journals that have a consistently high Immediacy Index attract citations rapidly.

[Learn more](#)

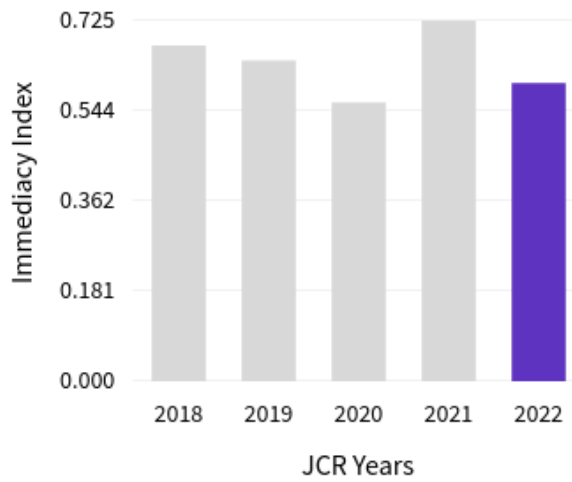

Immediacy Index calculation

|                                          |    |               |
|------------------------------------------|----|---------------|
| Cites in 2022 to items published in 2022 | 53 |               |
| <hr/>                                    |    | 53 / 84 = 0.6 |
| Number of items published in 2022        | 84 |               |
